# Supplementary material for: Associations Between Wildfire‐Related PM2.5 and Intensive Care Unit Admissions in the United States, 2006–2015
Source: PubMed Central journal article supplement — Geohealth. 2021 May 1;5(5):e2021GH000385. doi: 10.1029/2021GH000385 (PMC8095362; doi:10.1029/2021gh000385), 2021-05-01
Supplement: GH2-5-e2021GH000385-s001.pdf [file GH2-5-e2021GH000385-s001.pdf]

1 **Supplemental Information for “Associations between wildfire-related PM<sub>2.5</sub> and Intensive**  
2 **Care Unit Admissions in the United States, 2006-2015.”**

3

4 Cecilia Sorensen<sup>1</sup>, John A. House<sup>2</sup>, Katelyn O’Dell<sup>3</sup>, Steven J. Brey<sup>3</sup>, Bonne Ford<sup>3</sup>, Jeffrey R.  
5 Pierce<sup>3</sup>, Emily V. Fischer<sup>3</sup>, Jay Lemery<sup>1</sup>, James L. Crooks<sup>4,5,\*</sup>

6

7 <sup>1</sup>University of Colorado School of Medicine, Department of Emergency Medicine, Aurora,  
8 Colorado, USA

9 <sup>2</sup>Premier, Inc., Charlotte, NC, USA

10 <sup>3</sup>Department of Atmospheric Science, Colorado State University, Ft. Collins, Colorado, USA

11 <sup>4</sup>Department of Biomedical Research and Division of Biostatistics and Bioinformatics, National  
12 Jewish Health, Denver, Colorado, USA

13 <sup>5</sup>Department of Epidemiology, Colorado School of Public Health, Aurora, Colorado, USA

14

15

16 \*Corresponding author

17 James L. Crooks ([CrooksJ@NJHealth.org](mailto:CrooksJ@NJHealth.org))

18 1400 Jackson Street, Denver CO 80206

19 303-398-1543

|                             | Smoke PM <sub>2.5</sub> | Non-Smoke<br>PM <sub>2.5</sub> | PM <sub>10</sub> | O <sub>3</sub> | Mean<br>Temperature | Dew Point<br>Temperature |
|-----------------------------|-------------------------|--------------------------------|------------------|----------------|---------------------|--------------------------|
| Smoke PM <sub>2.5</sub>     | 1.000                   | -0.033                         | 0.421            | 0.272          | 0.170               | 0.087                    |
| Non-Smoke PM <sub>2.5</sub> | -0.033                  | 1.000                          | 0.422            | 0.374          | 0.284               | 0.277                    |
| PM <sub>10</sub>            | 0.421                   | 0.422                          | 1.000            | 0.390          | 0.271               | 0.011                    |
| O <sub>3</sub>              | 0.272                   | 0.374                          | 0.390            | 1.000          | 0.332               | 0.041                    |
| Mean Temperature            | 0.170                   | 0.284                          | 0.271            | 0.332          | 1.000               | 0.766                    |
| Dew Point Temperature       | 0.087                   | 0.277                          | 0.011            | 0.041          | 0.766               | 1.000                    |

20  
21  
22

*Supplemental Table 1: Pearson correlations between meteorological and air pollution variables. Ozone has been mean-centered. All two-sided pairwise Pearson correlation test p-values are  $<10^{-10}$  with the exception of the correlation between PM<sub>10</sub> and Dew Point Temperature (indicated in blue), which has an unadjusted p-value of 0.0031.*

Daily Smoke PM<sub>2.5</sub> Concentrations by Metro Area

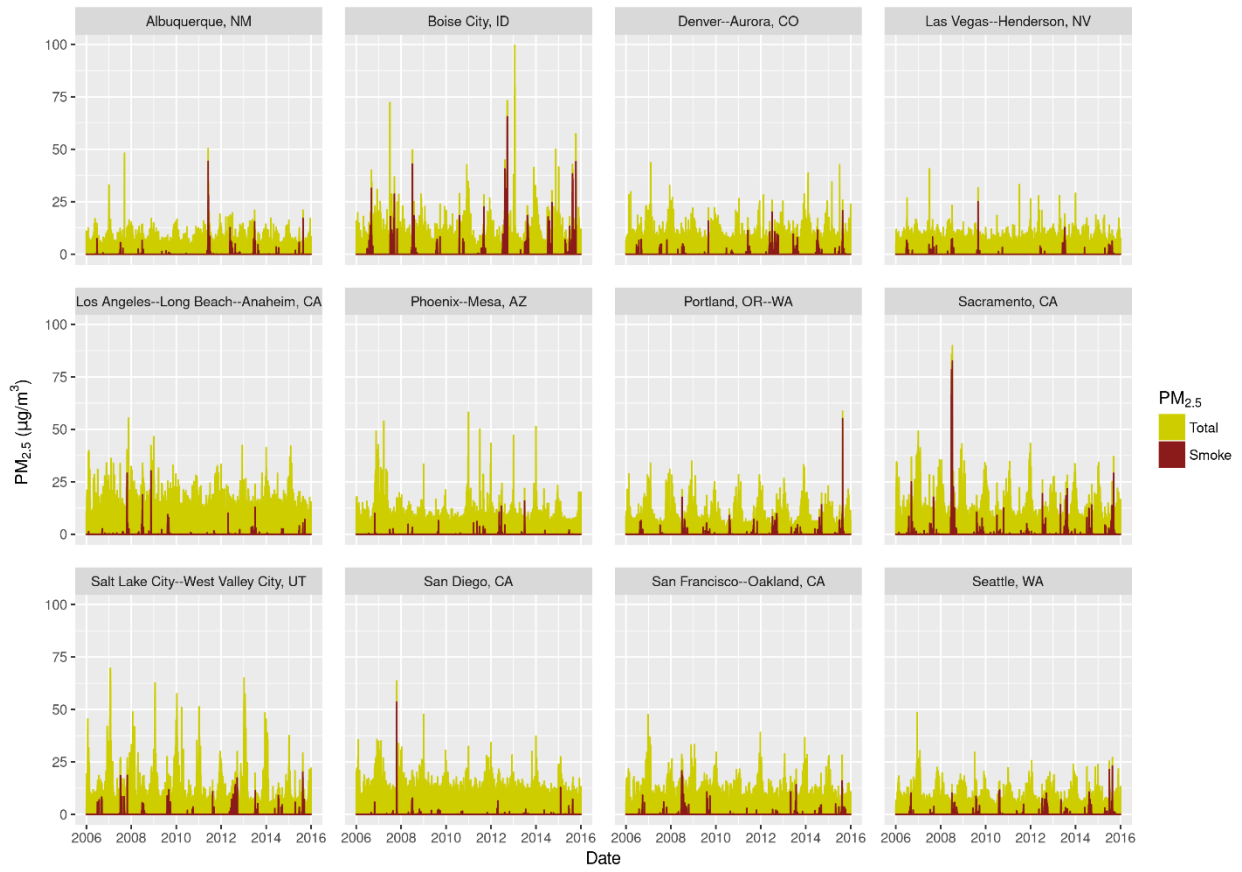

23  
24  
25

Supplemental Figure 1: Daily total and smoke PM<sub>2.5</sub> concentrations at twelve metropolitan areas in the U.S. in the years 2006-2015.

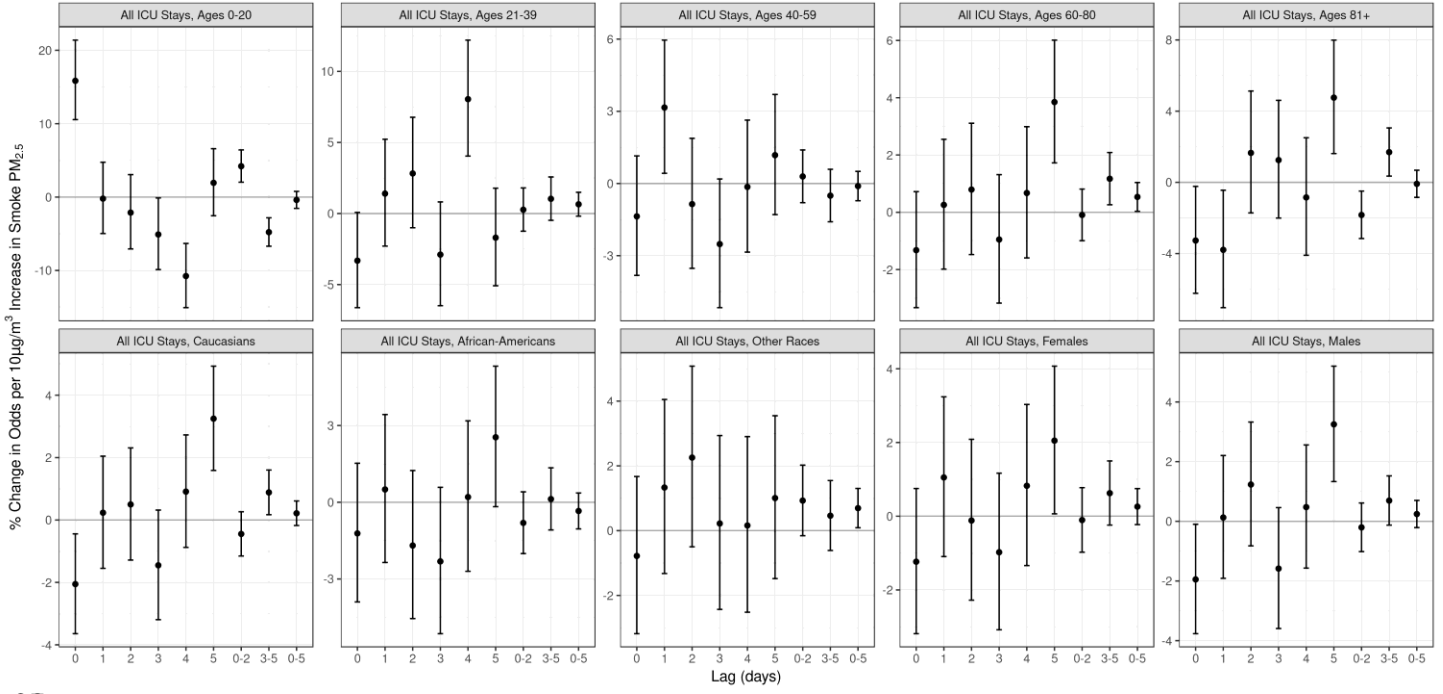

27 *Supplemental Figure 2: Distributed lag model results stratified by patient demographic characteristics*

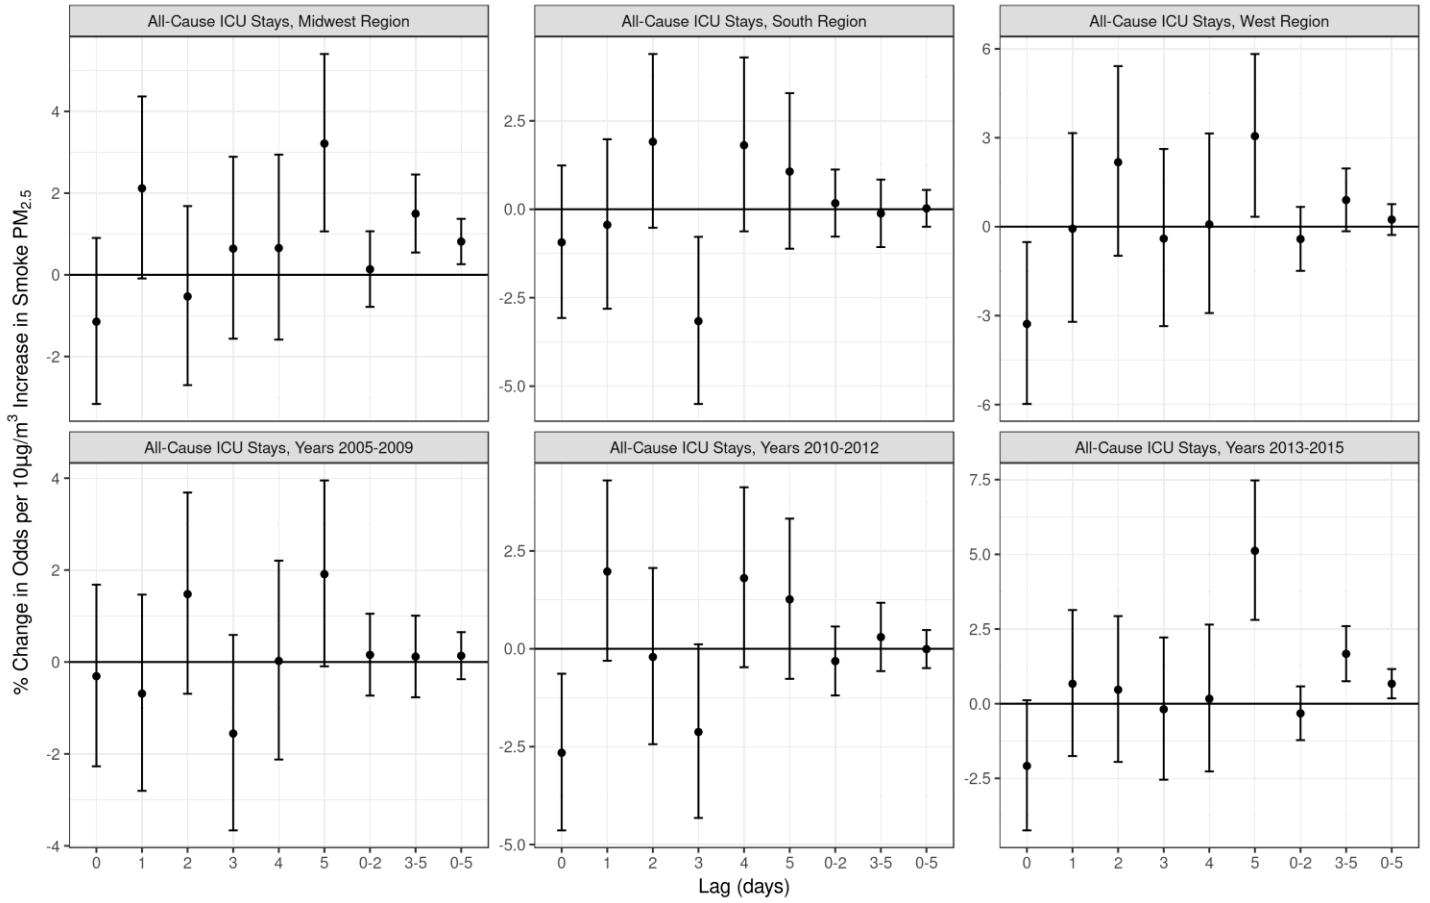

29 *Supplemental Figure 3: Distributed-lag model results stratified by hospital census region and time period of ICU admission*

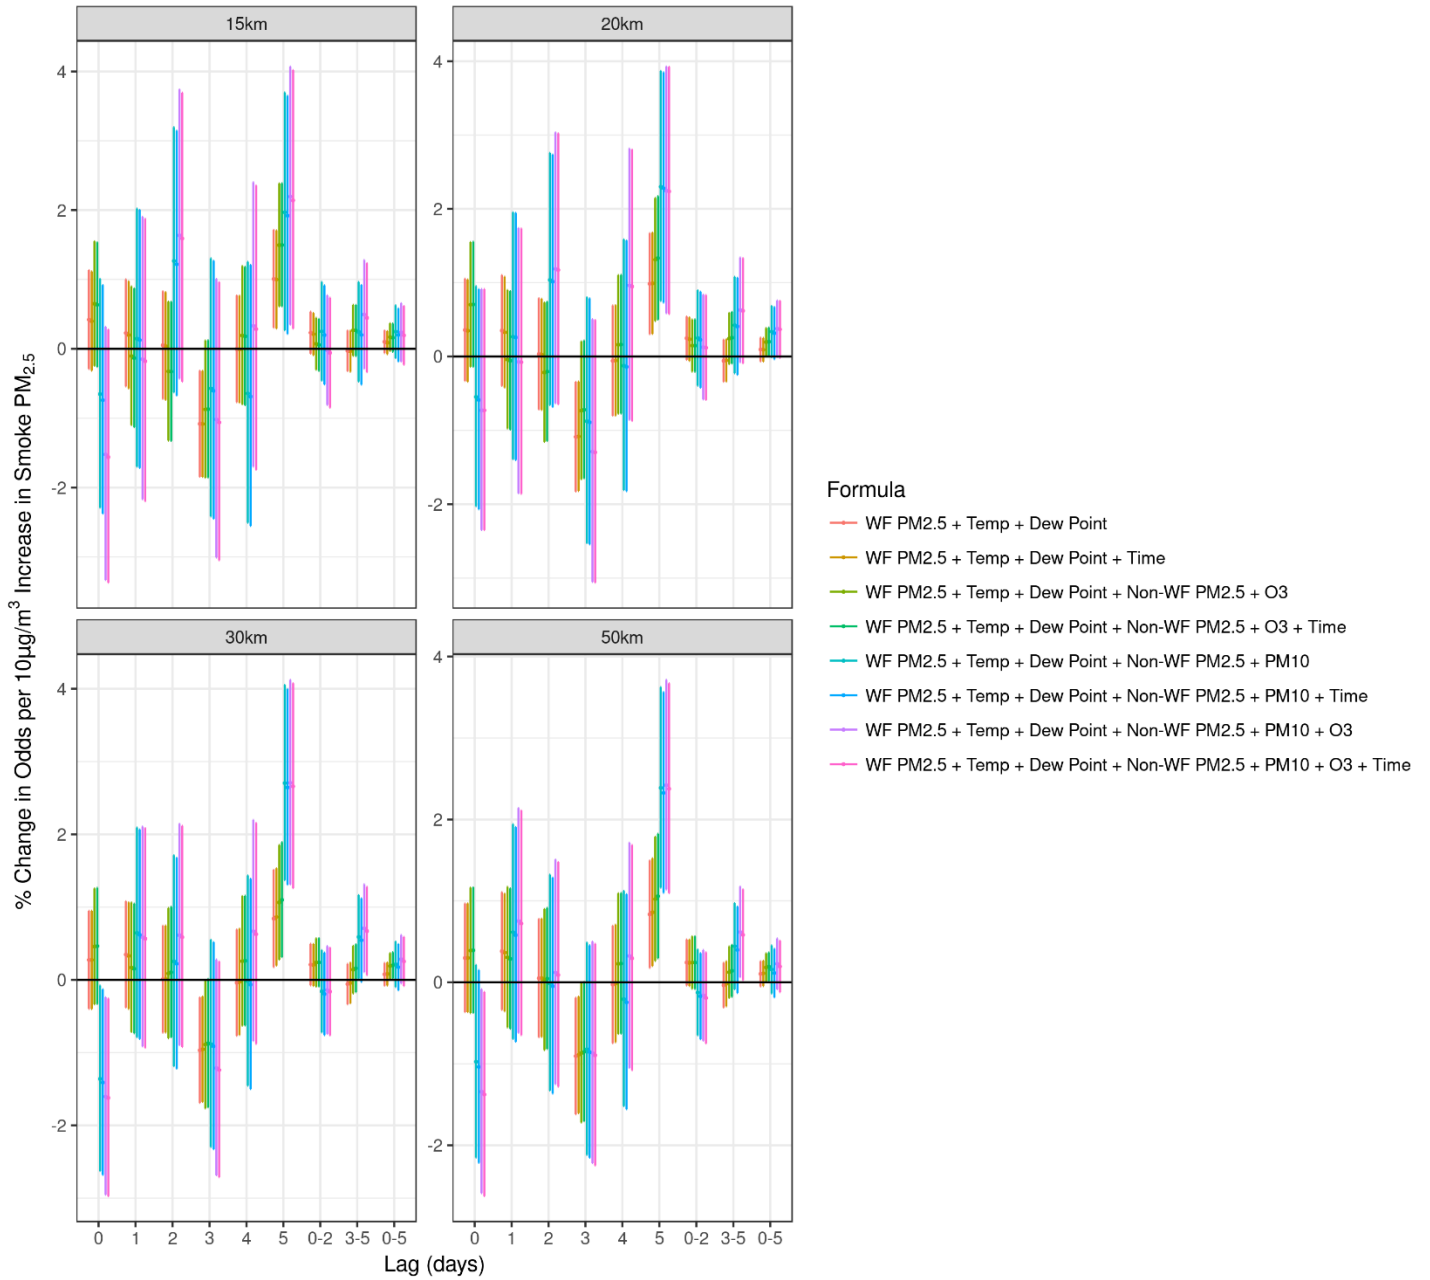

31 Supplemental Figure 4: Results using alternative buffer distances for calculating ambient PM10, ozone, mean temperature, and  
 32 dew point temperature at the hospital ZIP code. To facilitate comparison, our main model results are shown in magenta in the  
 33 30km panel.

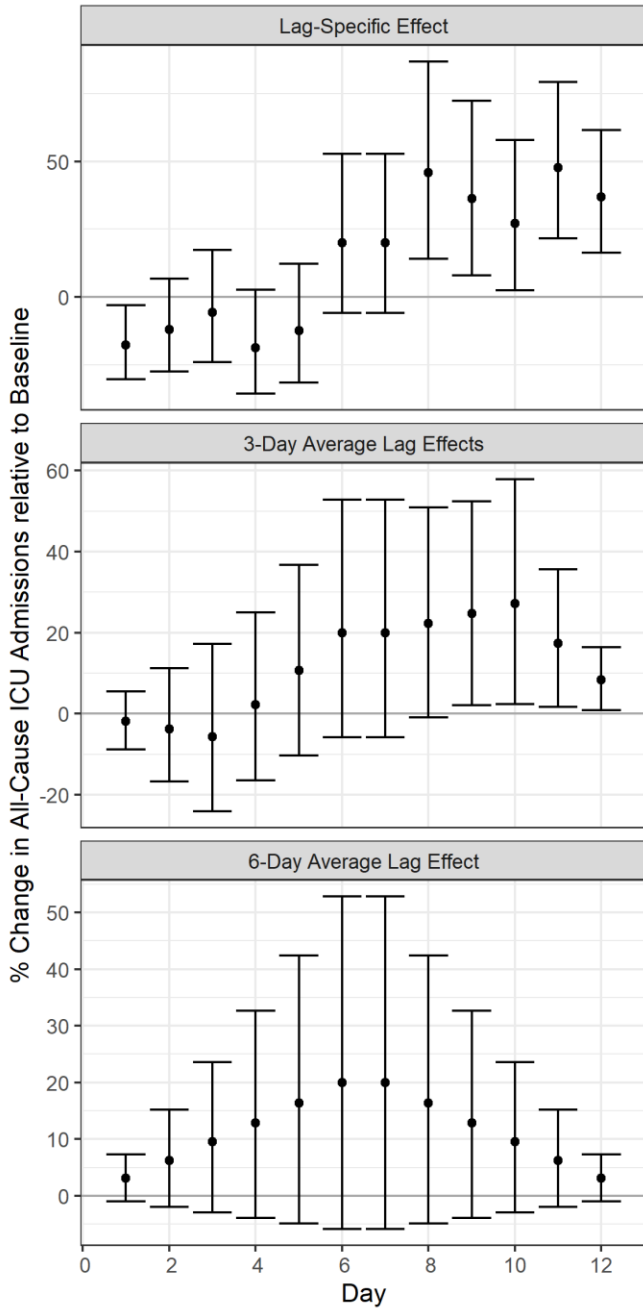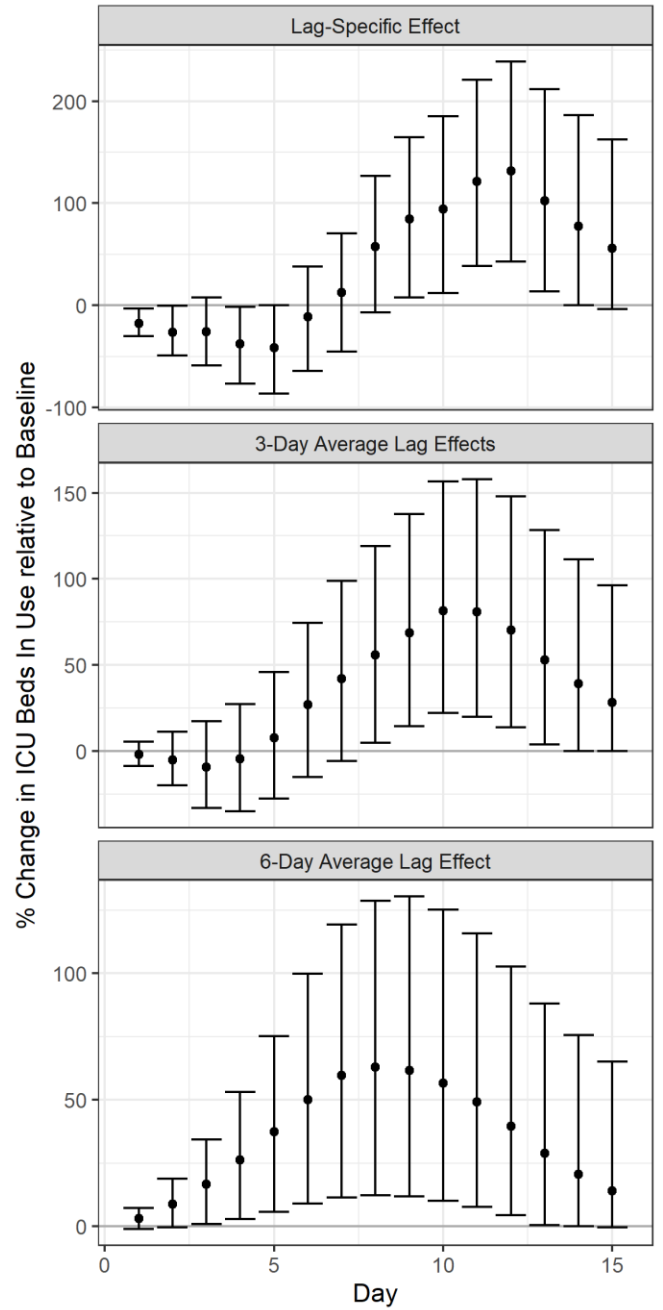

35 *Supplemental Figure 5: Percent changes in ICU admissions (left) and simulated ICU bed utilization (right) using the day-specific*  
 36 *lagged associations (top), the 3-day average associations over lags 0-2 and 3-5 (middle), and the 6-day average association over*  
 37 *lags 0-5 (bottom).*
